# Supplementary material for: The DNRA-Denitrification Dichotomy Differentiates Nitrogen Transformation Pathways in Mountain Lake Benthic Habitats
Source: Front Microbiol. 2019 Jun 4;10:1229. doi: 10.3389/fmicb.2019.01229 (PMC6558203; doi:10.3389/fmicb.2019.01229)
Supplement: Supplementary file 2 [file Table_2.XLSX]

## Sheet: Table_S2
Gene		16S rRNA				nirS						nirK						nosZI						nosZII						nrfA						hzo						amoA AOA						amoA AOB
Lake	Habitat (n)	copies * ng DNA-1		copies * g DW-1		copies * 16S copies-1 (%)		copies * ng DNA-1		copies * g DW-1		copies * 16S copies-1 (%)		copies * ng DNA-1		copies * g DW-1		copies * 16S copies-1 (%)		copies * ng DNA-1		copies * g DW-1		copies * 16S copies-1 (%)		copies * ng DNA-1		copies * g DW-1		copies * 16S copies-1 (%)		copies * ng DNA-1		copies * g DW-1		copies * 16S copies-1 (%)		copies * ng DNA-1		copies * g DW-1		copies * 16S copies-1 (%)		copies * ng DNA-1		copies * g DW-1		copies * 16S copies-1 (%)
		mean	SD	mean	SD	mean	SD	mean	SD	mean	SD	mean	SD	mean	SD	mean	SD	mean	SD	mean	SD	mean	SD	mean	SD	mean	SD	mean	SD	mean	SD	mean	SD	mean	SD	mean	SD	mean	SD	mean	SD	mean	SD	mean	SD	mean	SD	mean	SD
All lakes	All habitats (226)	267000	115000	56800000000	45400000000	6.81	6.08	16800	14900	4070000000	5120000000	0.28	0.25	785	757	153000000	169000000	0.237277	0.270427	633.741	821.849	1.09807e+08	1.07804e+08	0.083488	0.0818997	217.255	197.972	4.55756e+07	5.16735e+07	6.73	4.12	17200	13500	3510000000	4000000000	0.17	0.17	423	419	99100000	138000000	0.87	2.66	1940	5940	393000000	1600000000	0.05	0.14
	D (126)	259000	119000	56900000000	41200000000	6.76	5.54	17200	14700	4300000000	5210000000	0.22	0.21	591	690	124000000	142000000	0.18206	0.11463	479.279	332.852	1.01267e+08	8.44335e+07	0.0661012	0.0585169	189.775	185.864	4.68101e+07	5.8842e+07	8.49	3.97	21700	14800	4750000000	4750000000	0.14	0.16	348	391	92800000	153000000	0.18	0.29	418	607	93500000	168000000	0.04	0.13
	I (23)	229000	52400	60600000000	28300000000	11.69	6.74	27400	16700	7500000000	5830000000	0.29	0.12	668	297	181000000	105000000	0.240746	0.151191	530.02	331.296	1.36359e+08	1.03013e+08	0.114831	0.0763977	253.324	158.615	7.06269e+07	5.60538e+07	4.5	1.92	10200	4790	2770000000	2010000000	0.12	0.1	264	226	65500000	44000000	5.73	6.21	12900	14100	3190000000	4100000000	0.01	0
	E (11)	218000	48900	78400000000	18400000000	12.77	4.24	29300	16300	10400000000	5820000000	0.24	0.08	529	208	186000000	61400000	0.221671	0.0952097	465.372	166.729	1.67748e+08	6.29292e+07	0.0995925	0.0226408	215.363	63.4497	7.70912e+07	2.10431e+07	6.31	2.14	13500	5110	4950000000	2060000000	0.16	0.07	348	175	121000000	53600000	0.05	0.04	123	100	43800000	36300000	0.01	0.01
	C (11)	320000	103000	31300000000	22900000000	5.25	5.99	12800	10600	1880000000	2360000000	0.41	0.26	1380	883	96100000	68500000	0.441792	0.338241	1082.49	762.063	3.57803e+07	4.93872e+07	0.190782	0.163328	424.893	344.445	1.09071e+07	1.54885e+07	7.63	2.42	24600	11500	1950000000	1070000000	0.07	0.04	213	108	24400000	33600000	0.14	0.24	344	450	26800000	53400000	0.01	0.01
	R (22)	258000	82800	9450000000	12100000000	6.08	7.61	13300	13800	418000000	637000000	0.44	0.3	1080	708	41700000	68000000	0.441792	0.338241	1082.49	762.063	3.57803e+07	4.93872e+07	0.190782	0.163328	424.893	344.445	1.09071e+07	1.54885e+07	6.15	3.65	15500	10200	610000000	969000000	0.19	0.16	427	353	14800000	21300000	1.72	1.88	3560	3680	64200000	128000000	0.09	0.12
	L (33)	329000	143000	86400000000	64300000000	2.59	2.34	7230	5990	1840000000	2000000000	0.41	0.33	1290	948	323000000	256000000	0.333162	0.561695	1058.77	1836.79	1.758e+08	1.78303e+08	0.0629596	0.0298271	186.176	76.6513	4.59706e+07	2.81383e+07	1.75	1.02	5020	2180	1280000000	758000000	0.32	0.21	908	455	220000000	128000000	0.08	0.13	196	277	39100000	48100000	0.09	0.24
R	I (2)	226000	3240	23400000000	10600000000	18.54	15.27	41600	33800	5150000000	5540000000	0.16	0.1	359	216	42600000	39900000	0.334845	0.0584361	754.434	120.993	8.15558e+07	4.90821e+07	0.164085	0.0210154	369.821	42.0998	3.95624e+07	2.22661e+07	3.79	1.14	8570	2700	828000000	133000000	0.28	0.3	634	660	82000000	99500000	10.07	5.61	22800	13000	2060000000	250000000	0.01	0
P	D (30)	249000	97100	73200000000	43400000000	10.37	6.58	26400	18900	8780000000	8040000000	0.16	0.08	404	217	128000000	96600000	0.147663	0.118338	348.251	221.265	1.13099e+08	9.57103e+07	0.118667	0.0662263	318.28	210.633	1.02788e+08	8.18112e+07	7.09	3.12	18100	10400	5670000000	4990000000	0.21	0.19	551	540	201000000	256000000	0.17	0.43	367	749	113000000	260000000	0.01	0.01
	I (21)	230000	55000	64100000000	26900000000	11.04	5.76	26000	15100	7730000000	5940000000	0.31	0.11	698	291	194000000	99200000	0.231784	0.154933	508.647	338.357	1.41578e+08	1.05941e+08	0.11014	0.0783101	242.229	161.553	7.35854e+07	5.76694e+07	4.57	1.98	10300	4950	2960000000	2010000000	0.1	0.06	229	139	63900000	40100000	5.32	6.23	11900	14100	3300000000	4290000000	0.01	0
	E (11)	218000	48900	78400000000	18400000000	12.77	4.24	29300	16300	10400000000	5820000000	0.24	0.08	529	208	186000000	61400000	0.221671	0.0952097	465.372	166.729	1.67748e+08	6.29292e+07	0.0995925	0.0226408	215.363	63.4497	7.70912e+07	2.10431e+07	6.31	2.14	13500	5110	4950000000	2060000000	0.16	0.07	348	175	121000000	53600000	0.05	0.04	123	100	43800000	36300000	0.01	0.01
	C (4)	231000	55600	49700000000	23900000000	11.39	6.32	23900	9900	4620000000	1650000000	0.16	0.07	364	167	75600000	47900000	0.0927723	0.0750962	207.46	139.109	3.83386e+07	1.84344e+07	0.0721869	0.0437013	159.891	92.4863	3.16129e+07	2.11118e+07	5.75	2.36	12300	2190	2510000000	755000000	0.08	0.07	212	178	47200000	50200000	0.21	0.41	417	796	49800000	90600000	0.01	0
	L (6)	206000	58800	45800000000	20800000000	4.29	1.92	9040	5200	2050000000	1450000000	0.15	0.07	290	111	65500000	38000000	0.0822036	0.0582266	165.226	115.461	3.56751e+07	2.39381e+07	0.0751383	0.0208992	151.649	53.6803	3.34347e+07	1.47482e+07	2.83	0.83	5830	2510	1340000000	863000000	0.35	0.17	650	223	136000000	48100000	0.08	0.08	170	155	36500000	32100000	0.02	0.01
G	D (16)	201000	42300	36600000000	17200000000	11.86	6.7	25300	17500	5180000000	4110000000	0.05	0.03	98.3	68.1	20800000	16600000	0.209264	0.138144	445.557	343.757	8.30505e+07	7.65162e+07	0.0703296	0.0347915	147.17	90.6656	2.87215e+07	2.17153e+07	6.06	2.67	11900	5050	2150000000	1400000000	0.26	0.21	535	454	113000000	104000000	0.35	0.32	763	762	151000000	173000000	0.02	0.01
	L (4)	287000	97500	65700000000	39200000000	2.71	2.34	6090	4160	1120000000	617000000	0.34	0.12	1060	646	255000000	198000000	0.323605	0.0241373	915.47	271.96	2.07259e+08	1.16784e+08	0.0533853	0.0379097	130.413	64.5363	2.62963e+07	1.21728e+07	2.35	1.05	6470	2370	1460000000	760000000	0.31	0.06	859	148	189000000	86300000	0.25	0.31	500	593	76600000	77400000	0.04	0.03
RA	D (9)	337000	34900	61400000000	16600000000	6.48	1.37	21700	4900	4030000000	1550000000	0.2	0.06	650	169	115000000	32600000	0.220966	0.038903	745.842	161.092	1.3709e+08	4.74352e+07	0.0875259	0.0211656	295.287	79.2801	5.51062e+07	2.4888e+07	8.07	1.67	26900	4600	4880000000	1460000000	0.1	0.04	333	139	60300000	30200000	0.05	0.04	181	138	34500000	29400000	0.01	0
	L (4)	533000	278000	208000000000	90200000000	1.19	0.89	8140	10400	3040000000	3660000000	0.22	0.05	1120	381	439000000	105000000	0.138863	0.0497925	673.552	194.371	2.65885e+08	6.21923e+07	0.0341066	0.0118764	163.025	37.35	6.58801e+07	1.82366e+07	1.06	0.36	5160	1410	2090000000	685000000	0.16	0.05	808	238	320000000	83400000	0*	0*	0*	0*	0*	0*	0.01	0
GB	D (10)	240000	63600	47100000000	29200000000	6.3	3.05	16500	10900	3720000000	3520000000	0.18	0.09	460	274	99300000	85300000	0.202844	0.0815918	515.409	282.732	1.08022e+08	8.15876e+07	0.044896	0.0456723	122.071	131.17	3.00984e+07	3.83452e+07	9	2.99	21800	9200	4430000000	3110000000	0.18	0.17	469	471	114000000	141000000	0.2	0.15	493	448	100000000	104000000	0.03	0.02
	R (8)	255000	26600	5180000000	8270000000	4.02	2.85	10200	7340	136000000	215000000	0.16	0.16	436	457	8760000	17900000	0.193386	0.175609	495.139	456.723	4.78105e+06	6.0228e+06	0.181778	0.186767	462.045	460.554	5.63433e+06	9.64053e+06	5.39	2.79	13400	6450	115000000	124000000	0.13	0.09	341	231	2560000	2840000	1.9	1.47	4890	3630	116000000	208000000	0.11	0.15
	L (3)	390000	81700	106000000000	39600000000	2.36	1.09	8650	2570	2220000000	504000000	0.54	0.08	2120	654	580000000	253000000	0.154575	0.151583	522.835	401.354	1.25442e+08	7.07864e+07	0.0819514	0.00410181	321.333	79.8547	8.74439e+07	3.61017e+07	0.92	0.3	3410	450	889000000	118000000	0.33	0.15	1250	603	336000000	205000000	0.11	0.03	426	93.1	113000000	32800000	0.19	0.2
Lo	D (10)	350000	155000	48800000000	21000000000	4.06	1.45	14700	7620	2070000000	1090000000	0.44	0.43	1540	1480	226000000	233000000	0.192045	0.0530822	694.746	323.58	9.91505e+07	4.56844e+07	0.0754137	0.0426245	278.888	158.937	4.00055e+07	2.28757e+07	10.42	4.28	34700	14800	5060000000	2710000000	0.1	0.06	340	186	51800000	33600000	0.02	0.01	77.7	52.7	10900000	6950000	0.01	0
	R (4)	368000	86200	22900000000	19400000000	1.15	0.33	4040	466	275000000	261000000	0.56	0.12	1980	169	132000000	122000000	0.469525	0.135958	1761.11	732.702	9.66284e+07	5.95905e+07	0.0341371	0.0129355	117.393	20.7476	7.56328e+06	6.19804e+06	8.33	5.93	27200	13600	1810000000	1570000000	0.07	0.04	254	141	20800000	26000000	0.05	0.03	169	79.1	9700000	5780000	0.01	0.01
	L (2)	419000	11200	99100000000	9790000000	1.24	0.37	5210	1670	1210000000	239000000	0.25	0	1030	20.9	245000000	26000000	0.208163	0.0171461	872.536	95.1253	2.05554e+08	3.60137e+06	0.0618841	0.00589695	259.438	31.6276	6.10688e+07	277736	1.69	0.32	7070	1540	1650000000	153000000	0.21	0.04	877	172	206000000	14500000	0	0	16.8	4.46	3910000	555000	0.01	0
B	D (8)	367000	168000	91100000000	71700000000	1.49	0.98	6660	6240	1830000000	2210000000	0.06	0.04	232	246	68200000	103000000	0.122554	0.064161	489.652	337.499	1.23149e+08	1.10138e+08	0.0214161	0.0262729	112.679	160.495	3.15516e+07	4.59679e+07	6.42	3.37	21100	8920	5040000000	3500000000	0.04	0.02	156	138	42600000	44800000	0.03	0.03	158	179	45300000	63100000	0.02	0.02
	L (3)	316000	14900	99300000000	21700000000	0.6	0.32	1880	1010	577000000	334000000	0.26	0.17	809	518	252000000	178000000	0.0799195	0.00729792	252.917	27.564	7.8825e+07	1.54335e+07	0.0343539	0.00564644	108.703	18.5453	3.382e+07	7.74774e+06	1.33	0.15	4210	423	1330000000	339000000	0.39	0.05	1230	194	378000000	52300000	0.01	0.01	39.6	21.5	12100000	7150000	0.01	0
Le	D (6)	374000	144000	43000000000	53500000000	1.65	1.12	7500	8780	1150000000	2160000000	0.58	0.25	2030	711	191000000	159000000	0.232014	0.0636303	844.33	295.323	8.27389e+07	9.59787e+07	0.0499162	0.0384957	223.058	257.397	3.28016e+07	6.10692e+07	11.33	1.84	43300	22000	5040000000	7030000000	0.06	0.05	230	153	19300000	19400000	0.1	0.06	324	188	22600000	16900000	0.01	0.01
	C (7)	372000	88100	20800000000	15400000000	1.74	0.62	6390	2650	314000000	251000000	0.56	0.21	1970	443	108000000	78900000	0.232093	0.0376128	848.961	186.49	4.76231e+07	3.42303e+07	0.0316987	0.00665445	119.158	43.6272	6.77028e+06	5.72731e+06	8.7	1.8	31700	7550	1630000000	1140000000	0.06	0.01	214	61.3	11300000	8400000	0.09	0.06	302	123	13600000	9610000	0.01	0.01
	R (1)	219000	-	7340000000	-	0.63	-	1380	-	46200000	-	0.39	-	849	-	28500000	-	0.309279	-	676.156	-	2.26883e+07	-	0.0110209	-	24.0944	-	808484	-	5.68	-	12400	-	416000000	-	0.02	-	45.3	-	1520000	-	0.04	-	96.5	-	3240000	-	0.03	-
	L (2)	426000	67100	83300000000	23600000000	0.97	0.03	4140	763	806000000	208000000	0.64	0.02	2720	355	535000000	166000000	0.0724318	0.0464067	293.016	149.131	6.59945e+07	5.59709e+07	0.0442922	0.0134183	184.196	27.4629	3.85771e+07	2.17359e+07	1.17	0.33	4880	611	1020000000	552000000	0.1	0.08	398	288	93400000	93500000	0	0	7.88	11.1	2090000	2950000	0	0
C	D (12)	259000	129000	55800000000	31000000000	6.37	2.42	14800	7850	3240000000	2090000000	0.3	0.13	696	428	155000000	113000000	0.326084	0.115773	779.2	381.112	1.69203e+08	1.02288e+08	0.07819	0.0548662	211.093	187.803	4.70739e+07	4.39132e+07	8.34	2.43	20100	8750	4390000000	2390000000	0.15	0.18	260	195	59900000	51900000	0.44	0.2	1090	683	240000000	181000000	0.26	0.37
	R (3)	188000	43800	984000000	104000000	1.4	0.36	2570	584	13500000	2350000	0.95	0.2	1740	226	9220000	1380000	1.11354	0.311152	2011.48	148.192	1.08452e+07	2.49418e+06	0.325001	0.138386	571.69	113.47	3.16966e+06	1.22535e+06	2.73	0.87	4880	471	26700000	8040000	0.11	0.06	186	62	1050000	522000	4.32	0.79	8050	1830	43000000	12300000	0.23	0.11
	L (3)	328000	45000	32200000000	9630000000	0.24	0.19	761	553	78500000	62700000	0.25	0.23	797	671	82000000	74700000	2.03609	0.306601	6642.29	1019.23	6.41453e+08	1.42073e+08	0.0459597	0.003895	150.158	18.0935	1.48276e+07	4.4475e+06	0.58	0.48	1830	1400	185000000	157000000	0.17	0.09	565	272	58100000	33900000	0.04	0.03	129	123	13800000	14000000	0.65	0.54
RC	D (19)	201000	105000	44600000000	32700000000	4.27	2.99	9130	7370	1970000000	1680000000	0.17	0.11	420	435	101000000	134000000	0.144274	0.0866109	283.773	177.425	6.04689e+07	4.24089e+07	0.00655399	0.00466963	16.4085	17.8425	4.0221e+06	5.65243e+06	11.69	5.69	23600	23300	5740000000	8560000000	0.04	0.03	67.4	42.6	13800000	8350000	0.14	0.17	302	372	62100000	74800000	0.02	0.02
	R (6)	228000	93000	10700000000	8490000000	15.35	9.12	30800	13200	1150000000	823000000	0.47	0.15	1030	433	43500000	33300000	0.440725	0.117965	1016.45	582.855	5.11966e+07	5.35562e+07	0.270069	0.104255	573.758	215.478	2.57185e+07	2.1927e+07	7.51	3.08	16400	8760	796000000	810000000	0.4	0.13	842	358	36100000	22900000	1.57	2.17	2400	2970	52300000	23800000	0.05	0.02
	L (4)	228000	27000	35900000000	12500000000	4.96	3.53	10700	6940	1470000000	736000000	1.07	0.41	2510	1110	413000000	230000000	0.275321	0.0656344	617.539	106.346	9.48611e+07	2.86617e+07	0.10621	0.0349847	237.658	69.1229	3.52066e+07	7.27343e+06	2.39	1.38	5330	3050	775000000	385000000	0.69	0.3	1540	613	226000000	66500000	0.13	0.14	287	305	36700000	38500000	0.06	0.03
Po	D (6)	159000	73800	62000000000	76000000000	1.64	1.1	2260	1340	619000000	294000000	0.51	0.24	765	362	288000000	321000000	0.0328484	0.0201232	45.5486	29.7524	1.18978e+07	5.34644e+06	0.00990889	0.00386711	13.8921	4.12341	4.09769e+06	1.6886e+06	8.71	4.45	12300	4940	3770000000	2100000000	0.08	0.03	108	38	30600000	10100000	0	0	5.92	1.85	1820000	950000	0.02	0.01
	L (2)	315000	38200	131000000000	7780000000	5.07	0.58	15900	97	6640000000	1160000000	0.58	0.28	1760	666	764000000	412000000	0.0885057	0.0543514	268.312	137.319	1.17535e+08	7.7763e+07	0.0764413	0.000690891	240.842	31.3946	9.96621e+07	5.043e+06	1.69	0.38	5250	544	2220000000	624000000	0.23	0.15	764	547	299000000	172000000	0.07	0.01	227	3.94	94900000	15500000	0.02	0.01
Notes	copies * ng DNA-1, this is gene copies per ng of DNA template in the qPCR reaction
	copies * g DW-1, this is gene copies per gram of dry weight
	copies *16S copies-1(%), this is gene copies per copies of 16S rRNA in percentage
	*under detection limit: detected but in very low abundances (<0.5 copies/ng DNA template) in lithic biofilms from de cobbles of the littoral part of Redó Aigüestortes Lake (ReAT (Li))
[truncated: 4 more columns]
