# Supplementary material for: The DNRA-Denitrification Dichotomy Differentiates Nitrogen Transformation Pathways in Mountain Lake Benthic Habitats
Source: Front Microbiol. 2019 Jun 4;10:1229. doi: 10.3389/fmicb.2019.01229 (PMC6558203; doi:10.3389/fmicb.2019.01229)
Supplement: Supplementary file 4 [file Table_4.XLSX]

## Sheet: Table_S5
OTU_ID	Influence the main gradients of the com-gen-RDA (Fig. 5))	Influence the main gradients of the com-PCA (Fig. S6))	taxonomySilva119_rdp	cofidence	taxonomyGreen_rdp	cofidence_1
OTU_1	X	X	D_0__Bacteria;D_1__Proteobacteria;D_2__Betaproteobacteria;D_3__Nitrosomonadales;D_4__Nitrosomonadaceae;D_5__uncultured;D_6__uncultured beta proteobacterium	0.54	k__Bacteria;p__Proteobacteria;c__Betaproteobacteria;o__;f__;g__;s__	0.99
OTU_10	X	X	D_0__Bacteria;D_1__Proteobacteria;D_2__Deltaproteobacteria;D_3__Myxococcales;D_4__Cystobacteraceae;D_5__Anaeromyxobacter;D_6__uncultured delta proteobacterium	0.7	k__Bacteria;p__Proteobacteria;c__Deltaproteobacteria;o__Myxococcales;f__Myxococcaceae;g__Anaeromyxobacter;s__	1
OTU_1009		X	D_0__Bacteria;D_1__Cyanobacteria;D_2__Cyanobacteria;D_3__SubsectionIII;D_4__FamilyI	1	k__Bacteria;p__Cyanobacteria;c__Synechococcophycideae;o__Pseudanabaenales;f__Pseudanabaenaceae;g__Leptolyngbya;s__	0.66
OTU_103	X	X	D_0__Bacteria;D_1__Nitrospirae;D_2__Nitrospira;D_3__Nitrospirales;D_4__Nitrospiraceae;D_5__Nitrospira;D_6__uncultured Nitrospira sp.	0.95	k__Bacteria;p__Nitrospirae;c__Nitrospira;o__Nitrospirales;f__Nitrospiraceae;g__JG37-AG-70;s__	1
OTU_108	X	X	D_0__Bacteria;D_1__Proteobacteria;D_2__Betaproteobacteria;D_3__Burkholderiales;D_4__Comamonadaceae;D_5__Rhizobacter;D_6__uncultured bacterium	0.71	k__Bacteria;p__Proteobacteria;c__Betaproteobacteria;o__Burkholderiales;f__Comamonadaceae;g__Methylibium;s__	0.8
OTU_1098	X	X	D_0__Bacteria;D_1__Cyanobacteria;D_2__Cyanobacteria;D_3__SubsectionI;D_4__FamilyI;D_5__Synechococcus;D_6__uncultured bacterium	0.52	k__Bacteria;p__Cyanobacteria;c__Synechococcophycideae;o__Synechococcales;f__Synechococcaceae;g__Synechococcus;s__	0.88
OTU_110	X	X	D_0__Bacteria;D_1__Chloroflexi;D_2__uncultured;D_3__uncultured soil bacterium;D_4__uncultured soil bacterium;D_5__uncultured soil bacterium;D_6__uncultured soil bacterium	0.84	k__Bacteria;p__Chloroflexi;c__Anaerolineae;o__SJA-15;f__;g__;s__	1
OTU_117	X	X	D_0__Bacteria;D_1__Cyanobacteria;D_2__Cyanobacteria;D_3__SubsectionI;D_4__FamilyI	0.82	k__Bacteria;p__Cyanobacteria;c__Synechococcophycideae;o__Pseudanabaenales;f__Pseudanabaenaceae	0.75
OTU_1240	X		D_0__Bacteria;D_1__Proteobacteria;D_2__Betaproteobacteria;D_3__Nitrosomonadales;D_4__Nitrosomonadaceae;D_5__uncultured;D_6__uncultured Burkholderiaceae bacterium	0.98	k__Bacteria;p__Proteobacteria;c__Betaproteobacteria;o__MND1;f__;g__;s__	1
OTU_126	X	X	D_0__Bacteria;D_1__Gemmatimonadetes;D_2__Gemmatimonadetes;D_3__Gemmatimonadales;D_4__Gemmatimonadaceae;D_5__Gemmatimonas;D_6__uncultured Gemmatimonadetes bacterium	0.51	k__Bacteria;p__Gemmatimonadetes;c__Gemmatimonadetes;o__Gemmatimonadales;f__A1-B1;g__;s__	1
OTU_1272	X		D_0__Bacteria;D_1__Acidobacteria;D_2__Acidobacteria;D_3__Acidobacteriales;D_4__Acidobacteriaceae (Subgroup 1);D_5__uncultured;D_6__uncultured Acidobacteriales bacterium	0.82	k__Bacteria;p__Acidobacteria;c__Acidobacteriia;o__Acidobacteriales;f__Koribacteraceae;g__;s__	1
OTU_13	X	X	D_0__Bacteria;D_1__Actinobacteria;D_2__Thermoleophilia;D_3__Gaiellales;D_4__uncultured	1	k__Bacteria;p__Actinobacteria;c__Thermoleophilia;o__Gaiellales;f__;g__;s__	1
OTU_1302	X	X	D_0__Bacteria;D_1__Acidobacteria;D_2__Acidobacteria;D_3__Subgroup 6;D_4__uncultured Anaeromyxobacter sp.;D_5__uncultured Anaeromyxobacter sp.;D_6__uncultured Anaeromyxobacter sp.	0.62	k__Bacteria;p__Acidobacteria;c__Acidobacteria-6;o__iii1-15;f__;g__;s__	1
OTU_13120	X	X	D_0__Bacteria;D_1__Proteobacteria;D_2__Gammaproteobacteria;D_3__Methylococcales;D_4__Crenotrichaceae;D_5__Crenothrix;D_6__freshwater sediment metagenome	0.65	k__Bacteria;p__Proteobacteria;c__Gammaproteobacteria;o__Methylococcales;f__Crenotrichaceae;g__Crenothrix;s__	0.9
OTU_1344	X		D_0__Bacteria;D_1__Verrucomicrobia;D_2__Verrucomicrobiae;D_3__Verrucomicrobiales;D_4__Verrucomicrobiaceae;D_5__uncultured;D_6__uncultured Verrucomicrobiales bacterium	0.9	k__Bacteria;p__Verrucomicrobia;c__Verrucomicrobiae;o__Verrucomicrobiales;f__Verrucomicrobiaceae;g__Luteolibacter;s__	1
OTU_136	X	X	D_0__Bacteria;D_1__Gemmatimonadetes;D_2__Gemmatimonadetes;D_3__Gemmatimonadales;D_4__Gemmatimonadaceae;D_5__uncultured;D_6__uncultured actinobacterium	0.65	k__Bacteria;p__Gemmatimonadetes;c__Gemm-1;o__;f__;g__;s__	1
OTU_14	X	X	D_0__Bacteria;D_1__Candidate division WS3;D_2__uncultured soil bacterium PRR-10;D_3__uncultured soil bacterium PRR-10;D_4__uncultured soil bacterium PRR-10;D_5__uncultured soil bacterium PRR-10;D_6__uncultured soil bacterium PRR-10	0.57	k__Bacteria;p__WS3;c__PRR-12;o__Sediment-1;f__PRR-10;g__;s__	1
OTU_145	X	X	D_0__Bacteria;D_1__Proteobacteria;D_2__Alphaproteobacteria;D_3__Rhizobiales;D_4__Bradyrhizobiaceae;D_5__Bradyrhizobium;D_6__Bradyrhizobium elkanii	0.59	k__Bacteria;p__Proteobacteria;c__Alphaproteobacteria;o__Rhizobiales;f__Bradyrhizobiaceae	1
OTU_1488	X	X	D_0__Bacteria;D_1__Verrucomicrobia;D_2__Verrucomicrobiae;D_3__Verrucomicrobiales;D_4__Verrucomicrobiaceae;D_5__uncultured;D_6__uncultured Verrucomicrobiales bacterium	0.91	k__Bacteria;p__Verrucomicrobia;c__Verrucomicrobiae;o__Verrucomicrobiales;f__Verrucomicrobiaceae;g__Luteolibacter;s__	1
OTU_15	X	X	D_0__Bacteria;D_1__Proteobacteria;D_2__Deltaproteobacteria;D_3__GR-WP33-30	1	k__Bacteria;p__Proteobacteria;c__Deltaproteobacteria;o__Syntrophobacterales;f__Syntrophobacteraceae;g__;s__	1
OTU_152	X	X	D_0__Bacteria;D_1__Chloroflexi;D_2__KD4-96;D_3__uncultured Chloroflexi bacterium;D_4__uncultured Chloroflexi bacterium;D_5__uncultured Chloroflexi bacterium;D_6__uncultured Chloroflexi bacterium	0.98	k__Bacteria;p__Chloroflexi;c__Ellin6529;o__;f__;g__;s__	1
OTU_1578	X		D_0__Bacteria;D_1__Proteobacteria;D_2__Alphaproteobacteria;D_3__Rhodospirillales;D_4__JG37-AG-20;D_5__uncultured bacterium;D_6__uncultured bacterium	0.99	k__Bacteria;p__Proteobacteria;c__Alphaproteobacteria;o__Rhodospirillales;f__Rhodospirillaceae;g__;s__	0.99
OTU_16	X	X	D_0__Bacteria;D_1__Proteobacteria;D_2__Deltaproteobacteria;D_3__Syntrophobacterales;D_4__Syntrophaceae;D_5__uncultured;D_6__uncultured bacterium	0.58	k__Bacteria;p__Proteobacteria;c__Deltaproteobacteria;o__Syntrophobacterales;f__Syntrophaceae;g__;s__	0.99
OTU_168	X	X	D_0__Bacteria;D_1__Proteobacteria;D_2__Alphaproteobacteria;D_3__Rhizobiales;D_4__Hyphomicrobiaceae;D_5__Rhodoplanes;D_6__uncultured bacterium	0.78	k__Bacteria;p__Proteobacteria;c__Alphaproteobacteria;o__Rhizobiales;f__Hyphomicrobiaceae;g__Rhodoplanes;s__	0.82
OTU_169	X	X	D_0__Bacteria;D_1__Bacteroidetes;D_2__vadinHA17;D_3__uncultured soil bacterium;D_4__uncultured soil bacterium;D_5__uncultured soil bacterium;D_6__uncultured soil bacterium	0.77	k__Bacteria;p__Bacteroidetes;c__Bacteroidia;o__Bacteroidales;f__;g__;s__	0.99
OTU_17	X	X	D_0__Bacteria;D_1__Proteobacteria;D_2__Betaproteobacteria;D_3__SC-I-84;D_4__uncultured prokaryote;D_5__uncultured prokaryote;D_6__uncultured prokaryote	0.89	k__Bacteria;p__Proteobacteria;c__Betaproteobacteria;o__SC-I-84;f__;g__;s__	0.99
OTU_18		X	D_0__Bacteria;D_1__Proteobacteria;D_2__Betaproteobacteria;D_3__SC-I-84	0.88	k__Bacteria;p__Proteobacteria;c__Betaproteobacteria;o__SC-I-84;f__;g__;s__	0.67
OTU_183	X	X	D_0__Bacteria;D_1__Acidobacteria;D_2__Acidobacteria;D_3__Subgroup 6;D_4__uncultured Acidobacteria bacterium;D_5__uncultured Acidobacteria bacterium;D_6__uncultured Acidobacteria bacterium	0.62	k__Bacteria;p__Acidobacteria;c__Acidobacteria-6;o__iii1-15;f__;g__;s__	1
OTU_19	X		D_0__Bacteria;D_1__Acidobacteria;D_2__Holophagae;D_3__Subgroup 7;D_4__uncultured bacterium;D_5__uncultured bacterium;D_6__uncultured bacterium	0.91	k__Bacteria;p__Acidobacteria;c__iii1-8;o__32-20;f__;g__;s__	1
OTU_190	X		D_0__Bacteria;D_1__Actinobacteria;D_2__Acidimicrobiia;D_3__Acidimicrobiales;D_4__Acidimicrobiaceae;D_5__uncultured;D_6__uncultured actinobacterium	0.81	k__Bacteria;p__Actinobacteria;c__Acidimicrobiia;o__Acidimicrobiales;f__C111;g__;s__	0.95
OTU_198	X	X	D_0__Bacteria;D_1__Chloroflexi;D_2__Anaerolineae;D_3__Anaerolineales;D_4__Anaerolineaceae;D_5__uncultured;D_6__uncultured soil bacterium	0.9	k__Bacteria;p__Chloroflexi;c__Anaerolineae;o__envOPS12;f__;g__;s__	1
OTU_199	X	X	D_0__Bacteria;D_1__Cyanobacteria;D_2__Cyanobacteria;D_3__SubsectionIII;D_4__FamilyI;D_5__Phormidium;D_6__Cyanobacterium sp. PCC 7502	1	k__Bacteria;p__Cyanobacteria;c__Synechococcophycideae;o__Pseudanabaenales;f__Pseudanabaenaceae;g__Pseudanabaena;s__	1
OTU_2	X	X	D_0__Bacteria;D_1__Proteobacteria;D_2__Betaproteobacteria;D_3__B1-7BS;D_4__uncultured beta proteobacterium;D_5__uncultured beta proteobacterium;D_6__uncultured beta proteobacterium	0.98	k__Bacteria;p__Proteobacteria;c__Betaproteobacteria;o__;f__;g__;s__	0.73
OTU_201		X	D_0__Bacteria;D_1__Cyanobacteria;D_2__Cyanobacteria;D_3__SubsectionIII;D_4__FamilyI;D_5__Arthronema;D_6__uncultured cyanobacterium	0.5	k__Bacteria;p__Cyanobacteria;c__Synechococcophycideae;o__Pseudanabaenales;f__Pseudanabaenaceae;g__Arthronema;s__	1
OTU_21	X	X	D_0__Bacteria;D_1__Proteobacteria;D_2__Alphaproteobacteria;D_3__Rhizobiales;D_4__Methylocystaceae;D_5__Methylocystis;D_6__uncultured bacterium	0.85	k__Bacteria;p__Proteobacteria;c__Alphaproteobacteria;o__Rhizobiales;f__Methylocystaceae;g__Methylosinus;s__	0.98
OTU_22	X	X	D_0__Bacteria;D_1__Proteobacteria;D_2__Deltaproteobacteria;D_3__Syntrophobacterales;D_4__Syntrophaceae;D_5__uncultured;D_6__uncultured Smithella sp.	0.53	k__Bacteria;p__Proteobacteria;c__Deltaproteobacteria;o__Syntrophobacterales;f__Syntrophaceae;g__;s__	1
OTU_23		X	D_0__Bacteria;D_1__Proteobacteria;D_2__Betaproteobacteria;D_3__SC-I-84	1	k__Bacteria;p__Proteobacteria;c__Betaproteobacteria;o__SC-I-84;f__;g__;s__	1
OTU_232	X		D_0__Bacteria;D_1__Acidobacteria;D_2__Acidobacteria;D_3__Subgroup 6;D_4__uncultured bacterium;D_5__uncultured bacterium;D_6__uncultured bacterium	0.69	k__Bacteria;p__Acidobacteria;c__Acidobacteria-6;o__iii1-15;f__;g__;s__	1
OTU_2332	X		D_0__Bacteria;D_1__Proteobacteria;D_2__Alphaproteobacteria;D_3__Rhodospirillales;D_4__Acetobacteraceae;D_5__Acidiphilium;D_6__uncultured alpha proteobacterium	0.72	k__Bacteria;p__Proteobacteria;c__Alphaproteobacteria;o__Rhodospirillales;f__Acetobacteraceae;g__;s__	0.78
OTU_2334	X	X	D_0__Bacteria;D_1__Cyanobacteria;D_2__Cyanobacteria;D_3__SubsectionIII;D_4__FamilyI;D_5__Chamaesiphon;D_6__uncultured bacterium	1	k__Bacteria;p__Cyanobacteria;c__Synechococcophycideae;o__Synechococcales;f__Chamaesiphonaceae;g__;s__	1
OTU_245	X	X	D_0__Bacteria;D_1__Cyanobacteria;D_2__Cyanobacteria;D_3__SubsectionIII;D_4__FamilyI;D_5__uncultured;D_6__uncultured cyanobacterium	0.97	k__Bacteria;p__Cyanobacteria;c__Synechococcophycideae;o__Pseudanabaenales;f__;g__;s__	1
OTU_2585	X	X	D_0__Bacteria;D_1__Proteobacteria;D_2__Alphaproteobacteria;D_3__Rhizobiales;D_4__Xanthobacteraceae;D_5__uncultured	0.55	k__Bacteria;p__Proteobacteria;c__Alphaproteobacteria;o__Rhizobiales;f__Hyphomicrobiaceae;g__Rhodoplanes;s__	1
OTU_27	X	X	D_0__Bacteria;D_1__Proteobacteria;D_2__Deltaproteobacteria;D_3__Syntrophobacterales;D_4__Syntrophobacteraceae;D_5__uncultured;D_6__uncultured bacterium	0.82	k__Bacteria;p__Proteobacteria;c__Deltaproteobacteria;o__;f__;g__;s__	0.83
OTU_2918	X		D_0__Bacteria;D_1__Nitrospirae;D_2__Nitrospira;D_3__Nitrospirales;D_4__Nitrospiraceae;D_5__Nitrospira;D_6__uncultured Nitrospira sp.	0.94	k__Bacteria;p__Nitrospirae;c__Nitrospira;o__Nitrospirales;f__Nitrospiraceae;g__JG37-AG-70;s__	1
OTU_299	X	X	D_0__Bacteria;D_1__Cyanobacteria;D_2__Cyanobacteria;D_3__SubsectionI;D_4__FamilyI	0.79	k__Bacteria;p__Cyanobacteria;c__Oscillatoriophycideae;o__Chroococcales	0.93
OTU_3	X	X	D_0__Bacteria;D_1__Proteobacteria;D_2__Gammaproteobacteria;D_3__Xanthomonadales;D_4__uncultured;D_5__uncultured proteobacterium;D_6__uncultured proteobacterium	1	k__Bacteria;p__Proteobacteria;c__Gammaproteobacteria;o__Xanthomonadales;f__Sinobacteraceae;g__;s__	1
OTU_33	X	X	D_0__Bacteria;D_1__Cyanobacteria;D_2__Cyanobacteria	0.99	k__Bacteria;p__Cyanobacteria;c__Gloeobacterophycideae;o__Gloeobacterales;f__Gloeobacteraceae;g__Gloeobacter;s__	0.94
OTU_34	X	X	D_0__Bacteria;D_1__Bacteroidetes;D_2__vadinHA17;D_3__uncultured Alkaliflexus sp.;D_4__uncultured Alkaliflexus sp.;D_5__uncultured Alkaliflexus sp.;D_6__uncultured Alkaliflexus sp.	0.97	k__Bacteria;p__Bacteroidetes;c__Bacteroidia;o__Bacteroidales;f__;g__;s__	1
OTU_349	X	X	D_0__Bacteria;D_1__Cyanobacteria;D_2__Cyanobacteria;D_3__SubsectionI;D_4__FamilyI;D_5__Synechococcus;D_6__uncultured bacterium	0.72	k__Bacteria;p__Cyanobacteria;c__Synechococcophycideae;o__Synechococcales;f__Synechococcaceae;g__Paulinella;s__	0.71
OTU_35	X	X	D_0__Bacteria;D_1__Cyanobacteria;D_2__Cyanobacteria;D_3__SubsectionI;D_4__FamilyI	1	k__Bacteria;p__Cyanobacteria;c__Synechococcophycideae;o__Synechococcales;f__Synechococcaceae;g__Synechococcus;s__	0.89
OTU_351	X	X	D_0__Bacteria;D_1__Actinobacteria;D_2__Acidimicrobiia;D_3__Acidimicrobiales	1	k__Bacteria;p__Actinobacteria;c__Acidimicrobiia;o__Acidimicrobiales;f__;g__;s__	0.97
OTU_353	X	X	D_0__Bacteria;D_1__Cyanobacteria;D_2__Cyanobacteria;D_3__SubsectionIII;D_4__FamilyI;D_5__Leptolyngbya;D_6__uncultured bacterium	0.95	k__Bacteria;p__Cyanobacteria;c__Synechococcophycideae;o__Pseudanabaenales;f__Pseudanabaenaceae;g__Leptolyngbya;s__	0.99
OTU_3872	X	X	D_0__Bacteria;D_1__Chloroflexi;D_2__KD4-96	1	k__Bacteria;p__Chloroflexi;c__Ellin6529;o__;f__;g__;s__	1
OTU_4	X	X	D_0__Bacteria;D_1__Proteobacteria;D_2__Gammaproteobacteria;D_3__Methylococcales;D_4__Crenotrichaceae;D_5__Crenothrix;D_6__uncultured soil bacterium	0.56	k__Bacteria;p__Proteobacteria;c__Gammaproteobacteria;o__Methylococcales;f__Crenotrichaceae;g__Crenothrix;s__	1
OTU_4059	X		D_0__Bacteria;D_1__Acidobacteria;D_2__Acidobacteria;D_3__Acidobacteriales;D_4__Acidobacteriaceae (Subgroup 1);D_5__uncultured;D_6__uncultured Acidobacteria bacterium	0.65	k__Bacteria;p__Acidobacteria;c__Acidobacteriia;o__Acidobacteriales;f__Koribacteraceae;g__;s__	1
OTU_41	X	X	D_0__Bacteria;D_1__Proteobacteria;D_2__Betaproteobacteria;D_3__SC-I-84;D_4__uncultured prokaryote;D_5__uncultured prokaryote;D_6__uncultured prokaryote	0.56	k__Bacteria;p__Proteobacteria;c__Betaproteobacteria;o__SC-I-84;f__;g__;s__	1
OTU_43	X	X	D_0__Bacteria;D_1__Cyanobacteria;D_2__Cyanobacteria;D_3__SubsectionIII;D_4__FamilyI;D_5__uncultured	0.79	k__Bacteria;p__Cyanobacteria;c__Synechococcophycideae;o__Pseudanabaenales;f__Pseudanabaenaceae;g__Arthronema;s__	1
OTU_433	X		D_0__Bacteria;D_1__Chloroflexi;D_2__KD4-96;D_3__uncultured Anaerolineae bacterium;D_4__uncultured Anaerolineae bacterium;D_5__uncultured Anaerolineae bacterium;D_6__uncultured Anaerolineae bacterium	1	k__Bacteria;p__Chloroflexi;c__Ellin6529;o__;f__;g__;s__	1
OTU_468	X	X	D_0__Bacteria;D_1__Cyanobacteria;D_2__Cyanobacteria;D_3__SubsectionIII;D_4__FamilyI;D_5__Chamaesiphon;D_6__uncultured cyanobacterium	0.82	k__Bacteria;p__Cyanobacteria;c__Synechococcophycideae;o__Synechococcales;f__Chamaesiphonaceae;g__;s__	1
OTU_47		X	D_0__Bacteria;D_1__Proteobacteria;D_2__Betaproteobacteria;D_3__Nitrosomonadales;D_4__Nitrosomonadaceae;D_5__uncultured	1	k__Bacteria;p__Proteobacteria;c__Betaproteobacteria;o__Ellin6067;f__;g__;s__	1
OTU_480	X	X	D_0__Bacteria;D_1__Proteobacteria;D_2__Alphaproteobacteria;D_3__Sphingomonadales;D_4__Sphingomonadaceae;D_5__Sandarakinorhabdus;D_6__uncultured bacterium	0.98	k__Bacteria;p__Proteobacteria;c__Alphaproteobacteria;o__Sphingomonadales;f__Sphingomonadaceae;g__Zymomonas;s__	1
OTU_484	X	X	D_0__Bacteria;D_1__Chloroflexi;D_2__Caldilineae;D_3__Caldilineales;D_4__Caldilineaceae;D_5__uncultured;D_6__Chloroflexi bacterium ET1	0.98	k__Bacteria;p__Chloroflexi;c__Anaerolineae;o__Caldilineales;f__Caldilineaceae;g__Caldilinea;s__	1
OTU_514	X		D_0__Bacteria;D_1__Chloroflexi;D_2__Ktedonobacteria;D_3__Ktedonobacterales;D_4__HSB OF53-F07;D_5__uncultured Ktedonobacter sp.;D_6__uncultured Ktedonobacter sp.	0.79	k__Bacteria;p__Chloroflexi;c__Ktedonobacteria;o__Thermogemmatisporales;f__Thermogemmatisporaceae;g__;s__	1
OTU_55	X	X	D_0__Bacteria;D_1__Verrucomicrobia;D_2__OPB35 soil group;D_3__uncultured bacterium;D_4__uncultured bacterium;D_5__uncultured bacterium;D_6__uncultured bacterium	0.82	k__Bacteria;p__Verrucomicrobia;c__[Pedosphaerae];o__[Pedosphaerales];f__Ellin515;g__;s__	1
OTU_563	X	X	D_0__Bacteria;D_1__Acidobacteria;D_2__Acidobacteria;D_3__Subgroup 2;D_4__uncultured Acidobacteria bacterium;D_5__uncultured Acidobacteria bacterium;D_6__uncultured Acidobacteria bacterium	0.97	k__Bacteria;p__Acidobacteria;c__DA052;o__Ellin6513;f__;g__;s__	1
OTU_568	X	X	D_0__Bacteria;D_1__Proteobacteria;D_2__Alphaproteobacteria;D_3__Sphingomonadales;D_4__Sphingomonadaceae;D_5__Sphingomonas;D_6__Sphingomonas sp. RHLT2-12	0.84	k__Bacteria;p__Proteobacteria;c__Alphaproteobacteria;o__Sphingomonadales;f__Sphingomonadaceae;g__;s__	0.88
OTU_596	X	X	D_0__Bacteria;D_1__Cyanobacteria;D_2__Cyanobacteria;D_3__SubsectionIV;D_4__FamilyII;D_5__Calothrix;D_6__uncultured bacterium	0.64	k__Bacteria;p__Cyanobacteria;c__Nostocophycideae;o__Stigonematales;f__Rivulariaceae;g__Calothrix;s__	0.98
OTU_6	X		D_0__Bacteria;D_1__Proteobacteria;D_2__Betaproteobacteria;D_3__Nitrosomonadales;D_4__Nitrosomonadaceae;D_5__uncultured;D_6__bacterium TG160	0.69	k__Bacteria;p__Proteobacteria;c__Betaproteobacteria;o__Ellin6067;f__;g__;s__	1
OTU_6491	X		D_0__Bacteria;D_1__Cyanobacteria;D_2__Cyanobacteria;D_3__SubsectionI;D_4__FamilyI	1	k__Bacteria;p__Cyanobacteria;c__Synechococcophycideae;o__Synechococcales;f__Synechococcaceae;g__Synechococcus;s__	0.97
OTU_675	X	X	D_0__Bacteria;D_1__Nitrospirae;D_2__Nitrospira;D_3__Nitrospirales;D_4__Nitrospiraceae;D_5__Nitrospira;D_6__uncultured Nitrospiraceae bacterium	0.88	k__Bacteria;p__Nitrospirae;c__Nitrospira;o__Nitrospirales;f__Nitrospiraceae;g__Nitrospira;s__	1
OTU_683	X	X	D_0__Bacteria;D_1__Nitrospirae;D_2__Nitrospira;D_3__Nitrospirales;D_4__0319-6A21;D_5__uncultured bacterium;D_6__uncultured bacterium	0.72	k__Bacteria;p__Nitrospirae;c__Nitrospira;o__Nitrospirales;f__0319-6A21;g__;s__	1
OTU_6948	X	X	D_0__Bacteria;D_1__Proteobacteria;D_2__Betaproteobacteria;D_3__Rhodocyclales;D_4__Rhodocyclaceae;D_5__Sulfuritalea;D_6__uncultured Rhodocyclaceae bacterium	0.51	k__Bacteria;p__Proteobacteria;c__Betaproteobacteria;o__Rhodocyclales;f__Rhodocyclaceae;g__Sulfuritalea;s__	0.7
OTU_746	X		D_0__Bacteria;D_1__Acidobacteria;D_2__Acidobacteria;D_3__Subgroup 3;D_4__Unknown Family;D_5__Candidatus Solibacter;D_6__uncultured proteobacterium	0.68	k__Bacteria;p__Acidobacteria;c__Solibacteres;o__Solibacterales;f__;g__;s__	1
OTU_77	X	X	D_0__Bacteria;D_1__Proteobacteria;D_2__Betaproteobacteria;D_3__Burkholderiales;D_4__Comamonadaceae;D_5__Leptothrix;D_6__uncultured bacterium	0.9	k__Bacteria;p__Proteobacteria;c__Betaproteobacteria;o__Burkholderiales;f__Comamonadaceae;g__Leptothrix;s__	0.96
OTU_8	X		D_0__Bacteria;D_1__Cyanobacteria;D_2__Cyanobacteria	1	k__Bacteria;p__Cyanobacteria;c__Gloeobacterophycideae;o__Gloeobacterales;f__Gloeobacteraceae;g__Gloeobacter;s__	0.51
OTU_816	X	X	D_0__Bacteria;D_1__Chloroflexi;D_2__Dehalococcoidia;D_3__GIF9;D_4__uncultured bacterium;D_5__uncultured bacterium;D_6__uncultured bacterium	0.96	k__Bacteria;p__Chloroflexi;c__Dehalococcoidetes;o__GIF9;f__;g__;s__	1
OTU_840	X		D_0__Bacteria;D_1__Proteobacteria;D_2__Alphaproteobacteria;D_3__Rhizobiales;D_4__Rhizobiales Incertae Sedis;D_5__Rhizomicrobium;D_6__uncultured proteobacterium	0.87	k__Bacteria;p__Proteobacteria;c__Alphaproteobacteria;o__Ellin329;f__;g__;s__	1
OTU_9	X	X	D_0__Bacteria;D_1__Nitrospirae;D_2__Nitrospira;D_3__Nitrospirales;D_4__Nitrospiraceae;D_5__Nitrospira;D_6__uncultured Nitrospiraceae bacterium	0.94	k__Bacteria;p__Nitrospirae;c__Nitrospira;o__Nitrospirales;f__Nitrospiraceae;g__Nitrospira;s__	1
OTU_905	X		D_0__Bacteria;D_1__Proteobacteria;D_2__Alphaproteobacteria;D_3__Rhizobiales;D_4__Xanthobacteraceae;D_5__uncultured;D_6__uncultured Hyphomicrobiaceae bacterium	0.58	k__Bacteria;p__Proteobacteria;c__Alphaproteobacteria;o__Rhizobiales;f__Hyphomicrobiaceae;g__Rhodoplanes;s__	1
OTU_918	X	X	D_0__Bacteria;D_1__Chloroflexi;D_2__Ktedonobacteria;D_3__Ktedonobacterales;D_4__HSB OF53-F07;D_5__uncultured Ktedonobacter sp.;D_6__uncultured Ktedonobacter sp.	0.59	k__Bacteria;p__Chloroflexi;c__Ktedonobacteria;o__Thermogemmatisporales;f__Thermogemmatisporaceae;g__;s__	1
OTU_948	X	X	D_0__Bacteria;D_1__Chloroflexi;D_2__JG37-AG-4;D_3__uncultured bacterium;D_4__uncultured bacterium;D_5__uncultured bacterium;D_6__uncultured bacterium	0.97	k__Bacteria;p__AD3;c__ABS-6;o__;f__;g__;s__	1
OTU_979	X	X	D_0__Bacteria;D_1__Chloroflexi;D_2__JG30-KF-CM66;D_3__uncultured Armatimonadetes bacterium;D_4__uncultured Armatimonadetes bacterium;D_5__uncultured Armatimonadetes bacterium;D_6__uncultured Armatimonadetes bacterium	0.97	k__Bacteria;p__Chloroflexi;c__S085;o__;f__;g__;s__	1
